# Supplementary material
Source: PubMed Central journal article supplement (PMC6085815)
Supplement: tpmd170434.SD1.pdf [file tpmd170434.SD1.pdf]

## SUPPLEMENTAL MATERIALS

The supplementary material contains the following data:

1. Summary of drug analysis of amodiaquine (AQ), desethylamodiaquine (DAQ), artemisinin (ARN), artesunate (ARS), dihydroartemisinin (DHA), and piperazine (PPQ)
2. Liquid chromatography–tandem mass spectrometry (LC/MS/MS) analysis of AQ and DAQ
3. LC/MS/MS analysis of ARN
4. LC/MS/MS analysis of ARS and DHA
5. LC/MS/MS analysis of PPQ
6. Supplemental Table 13. Plasma concentrations of PPQ and DAQ after 3-day regimens of Artequick and Coarsucam in healthy Vietnamese volunteers.

### SUPPLEMENTAL MATERIAL 1

#### SUMMARY OF DRUG ANALYSIS OF AQ, DAQ, ARN, ARS, DHA, AND PPQ

Plasma concentrations of AQ, DAQ, ARN, ARS, DHA, and PPQ were measured on an AB Sciex 4000 QTRAP LC-MS/MS analyzer (Applied Biosystems, Concord, Ontario, Canada) preceded by a Prominence liquid chromatography system (Shimadzu, Canby, OR), including a temperature-controlled autosampler. The mobile phases were subjected to electrospray ionization in the positive ion mode, and elution of analytes was confirmed by multiple-reaction monitoring (MRM). In brief, the lower limit of quantification (LLOQ) of AQ and DAQ in plasma was 0.39 and 3.91 ng/mL ( $N = 5$ ), respectively, with an inaccuracy of  $\leq 1.79\%$ , using 50  $\mu\text{L}$  of sample. The inter-assay precision of analysis (percent coefficient of variation [CV]) for AQ and DAQ across the concentration range of 0.39–100 ng/mL and 3.91–2,000 ng/mL ( $N = 7$ –10), respectively, was  $\leq 6.91\%$ . The LLOQ of ARN in plasma was 1 ng/mL, with an inaccuracy of  $\leq 4.44\%$ , using 50  $\mu\text{L}$  of sample. The inter-assay precision of analysis for ARN across the concentration range of 1–1,000 ng/mL was  $\leq 12.26\%$  ( $N = 10$ –21). The LLOQ of ARS, and DHA in plasma was 1.19 and 1.96 ng/mL, respectively, with an inaccuracy of  $\leq 2.69\%$  ( $N = 5$ ), using 50  $\mu\text{L}$  of sample. The inter-assay precision of analysis for ARS and DHA across the concentration range of 1.19–728 ng/mL ( $N = 17$ –28) and 1.96–2,500 ng/mL ( $N = 16$ –27), respectively, was  $\leq 14.48\%$ . The LLOQ of PPQ in plasma was 0.25 ng/mL, with an inaccuracy of  $\leq 1.5\%$ , using 50  $\mu\text{L}$  of sample. The inter-assay precision of analysis for PPQ across the concentration range of 0.25–1,000 ng/mL was  $\leq 11.9\%$ .

### SUPPLEMENTAL MATERIAL 2

#### LC/MS/MS ANALYSIS OF AQ AND DAQ

##### Standards.

- Amodiaquine: Sample no. RMAQ 20100608-03. Worldwide Antimalarial Resistance Network Reference compound.
- Desethylamodiaquine: Sample no. RMAQm 20100526-18. Worldwide Antimalarial Resistance Network Reference compound.
- Internal standard: stable isotope labeled (SIL) AQ: Sample no. RMSILAQ 20110602-04. Worldwide Antimalarial Resistance Network Reference compound.
- Internal standard: SIL DAQ: Sample no. RMSILAQm 20110602-01. Worldwide Antimalarial Resistance Network Reference compound.

##### Chromatographic conditions.

- Liquid chromatography column: Phenomenex Luna Pentafluorophenyl (PFP) (2) 50 mm  $\times$  2.1 mm internal diameter (I.D.) 5  $\mu\text{m}$ , 00B-4448-B0.
- Pre-column: Phenomenex PFP 4 mm  $\times$  2.0 mm I.D. 5  $\mu\text{m}$ , AJO-8326.
- Mobile phase flow: isocratic, 0.5 mL/minute (24% mobile phase A, 76% mobile phase B).
- Mobile phase A: 5 mM ammonium acetate–0.1% formic acid.
- Mobile phase B: acetonitrile (ACN).
- Run time: 3.5 minutes.

Mass spectrometer conditions:

|                                      |        |
|--------------------------------------|--------|
| Curtain gas                          | 30     |
| Collision activated dissociation gas | Medium |
| Ion spray (voltage)                  | 3,500  |
| Temp ( $^{\circ}\text{C}$ )          | 500    |
| Nebuliser gas                        | 65     |
| Heater gas                           | 60     |
| Interface heater                     | On     |

## Mass spectrometry transitions:

| Analyte | Q1 (Da) | Q3 (Da) | Time (ms) | DP (v) | EP (v) | CE (v) | CXP (v) |
|---------|---------|---------|-----------|--------|--------|--------|---------|
| AQ      | 356.20  | 283.10  | 100       | 66     | 10     | 25     | 24      |
| SIL AQ  | 336.25  | 283.10  | 100       | 76     | 10     | 27     | 20      |
| DAQ     | 328.09  | 283.10  | 100       | 56     | 10     | 23     | 20      |
| SIL DAQ | 333.28  | 283.10  | 100       | 66     | 10     | 25     | 24      |

AQ = amodiaquine; CE = collision energy; CXP = collision cell exit potential; DAQ = desethylamodiaquine; DP = declustering potential; EP = entrance potential; SIL = stable isotope labeled.

### Subject plasma sample preparation.

- Subject plasma samples were thawed in a room-temperature circulating water bath and were vortex mixed before analysis.
- Calibrators and quality controls (QCs) were prepared by spiking AQ- and DAQ-free citrate phosphate dextrose anticoagulated human plasma (50  $\mu$ L) with ACN containing internal standard (1 ng/mL SIL AQ and SIL DAQ in ACN; 250  $\mu$ L) or blank ACN (250  $\mu$ L) for the double blank.
- Hundred microliters of 3 M ZnSO<sub>4</sub> was then added to all tubes to enhance protein precipitation. Calibrators and blanks were then treated as unknowns.
- The tubes were mixed by vortexing for 3 minutes at maximum vortex setting. The tubes were then centrifuged (20,817  $\times g$ , 5 minutes at 4°C).
- The organic layer (100  $\mu$ L) was subsequently transferred to a 96-well polypropylene microtitre plate containing 100  $\mu$ L of 0.1% formic acid and 5 mM ammonium acetate.
- Two microliters was injected onto the column.

**Calculation of results.** Chromatograms were integrated and processed using Applied Biosystems software (Analyst V1.4.2). Concentrations of AQ and DAQ in subject plasma samples and QCs were calculated from regression curves of peak area ratios (AQ: SIL AQ and DAQ: SIL DAQ) versus analyte concentration using Multiquant 2.1 software (Concord, Ontario, Canada). A weighting of (1/x<sup>2</sup>) was used to generate a quadratic regression curve.

**Testing of drug-free plasmas for ion suppression.** Six drug-free plasma samples were tested for matrix effect (ion suppression) to identify a drug-free plasma that showed no identifiable effect on drug quantification. This was performed by infusing a low quantity of AQ (10 ng/mL) and DAQ (10 ng/mL) while injecting ACN extracts from the six drug-free plasmas. None of the plasmas showed ion suppression and one of these, 2HSB003/09, was used to prepare standards and QC samples.

**Chromatograms.** Typical chromatograms of AQ, DAQ, and the internal standards SIL AQ and SIL DAQ in plasma are shown in Supplemental Figures 1–6. They are internal standards SIL AQ and SIL DAQ (Supplemental Figure 1); low-range QC plasma AQ and DAQ (Supplemental Figure 2); a low calibration standard (Supplemental Figure 3); a high calibration standard (Supplemental Figure 4); subject plasma at time = 0 hour (Supplemental Figure 5); and subject plasma at time = 1 hour (Supplemental Figure 6). The retention times for AQ, SIL AQ, DAQ, and SIL DAQ were approximately 1.55, 1.54, 1.42, and 1.41 minutes, respectively.

**A**

*B-AQ IS(Unknown) 366.3/283.1 - 20140115AQ DAQ Clinical samples subjects 21 and 22.wiff (sample 14)*  
Area: 46078, height: 2882, RT: 1.54 minutes

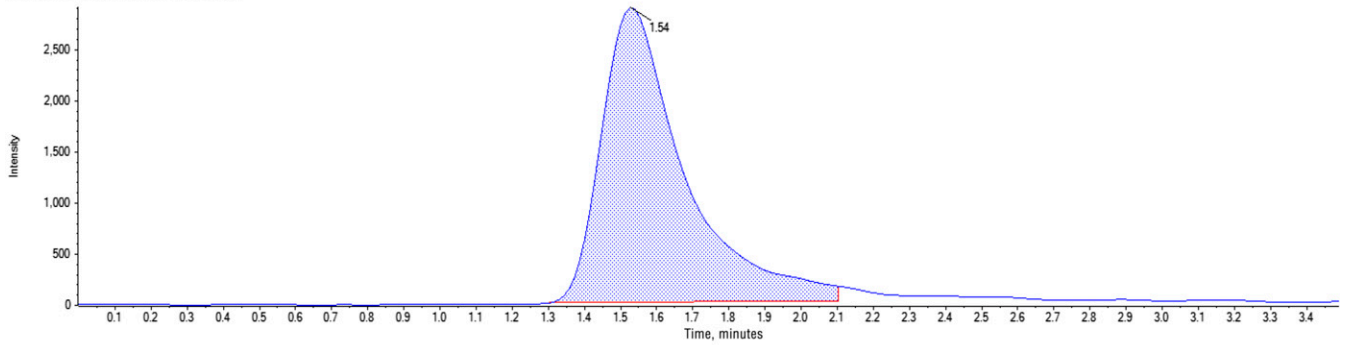

**B**

*B-DAQ IS(Unknown) 333.3/283.1 - 20140115AQ DAQ Clinical samples subjects 21 and 22.wiff (sample 14)*  
Area: 36515, height: 2450, RT: 1.41 minutes

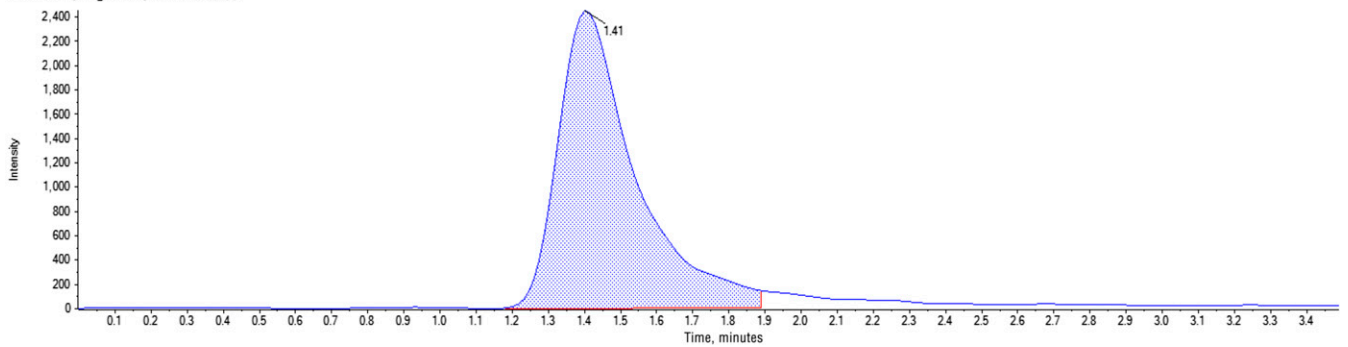

SUPPLEMENTAL FIGURE 1. Internal standards. (A) SIL AQ (1 ng/mL). (B) SIL DAQ (1 ng/mL). AQ = amodiaquine; DAQ = desethylamodiaquine; SIL = stable isotope labeled.

**A**

*QCL-AQ (Quality Control) 356.2/283.1 - 20140115AQ DAQ Clinical samples subjects 21 and 22.wiff (sample 32)*  
Area: 15572, height: 880, RT: 1.55 minutes

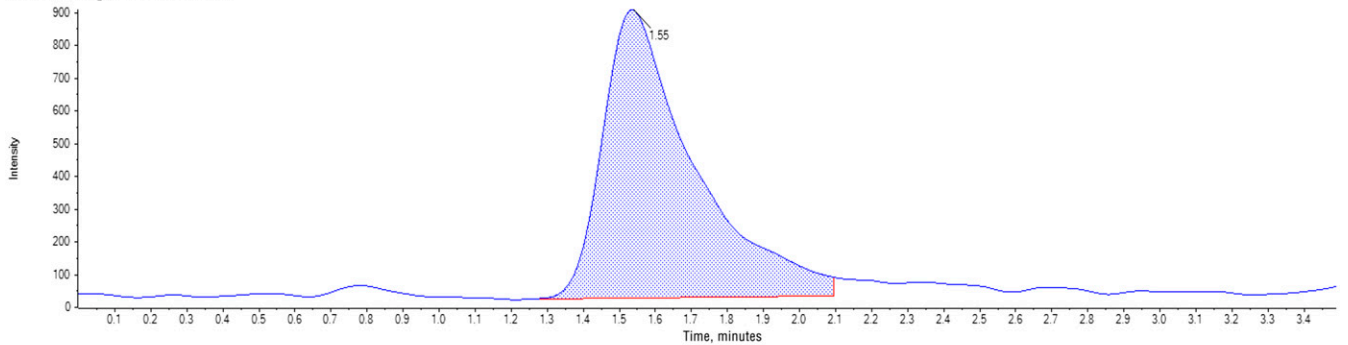

**B**

*QCL-DAQ (Quality Control) 328.1/283.1 - 20140115AQ DAQ Clinical samples subjects 21 and 22.wiff (sample 33)*  
Area: 37365, height: 2557, RT: 1.43 minutes

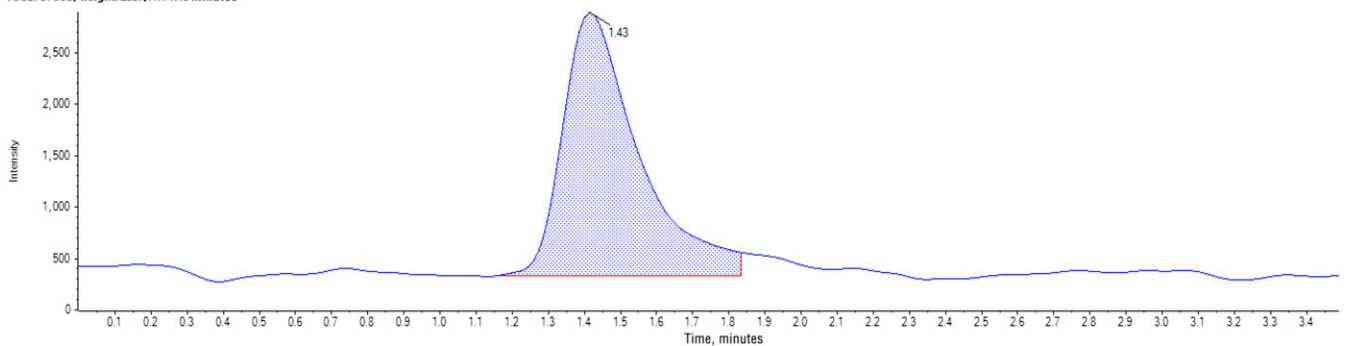

SUPPLEMENTAL FIGURE 2. Quality control (QC) low-range plasma sample (AQ 2.34 ng/mL/DAQ 6.00 ng/mL). (A) QC low AQ. (B) QC low DAQ. AQ = amodiaquine; DAQ = desethylamodiaquine.

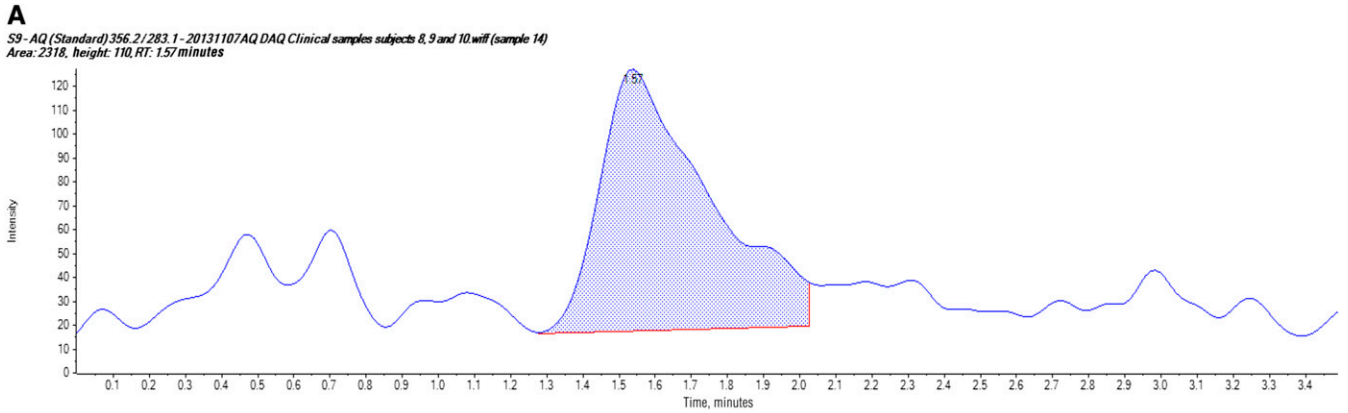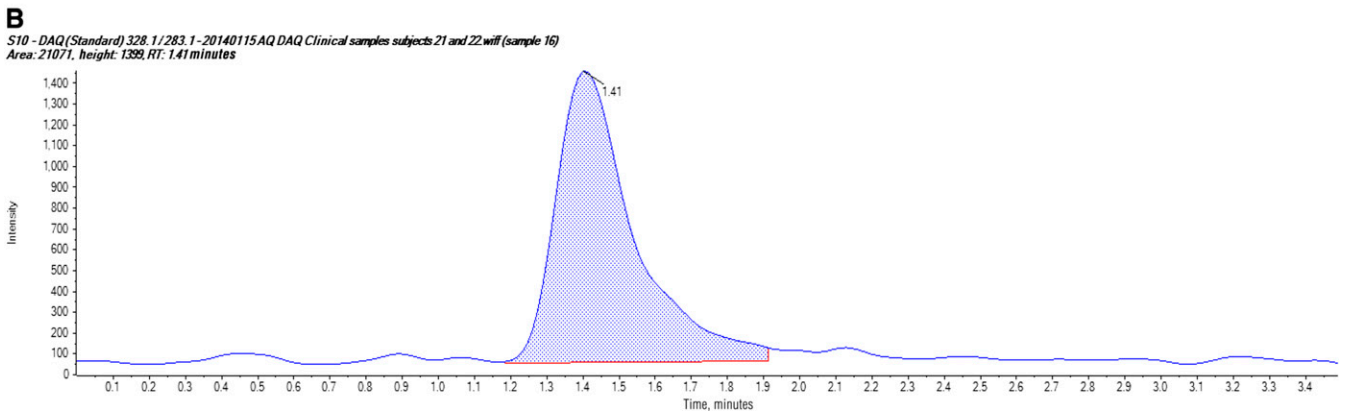

SUPPLEMENTAL FIGURE 3. Low calibration standard (AQ 0.391 ng/mL/DAQ 3.91 ng/mL). (A) AQ. (B) DAQ. AQ = amodiaquine; DAQ = desethylamodiaquine.

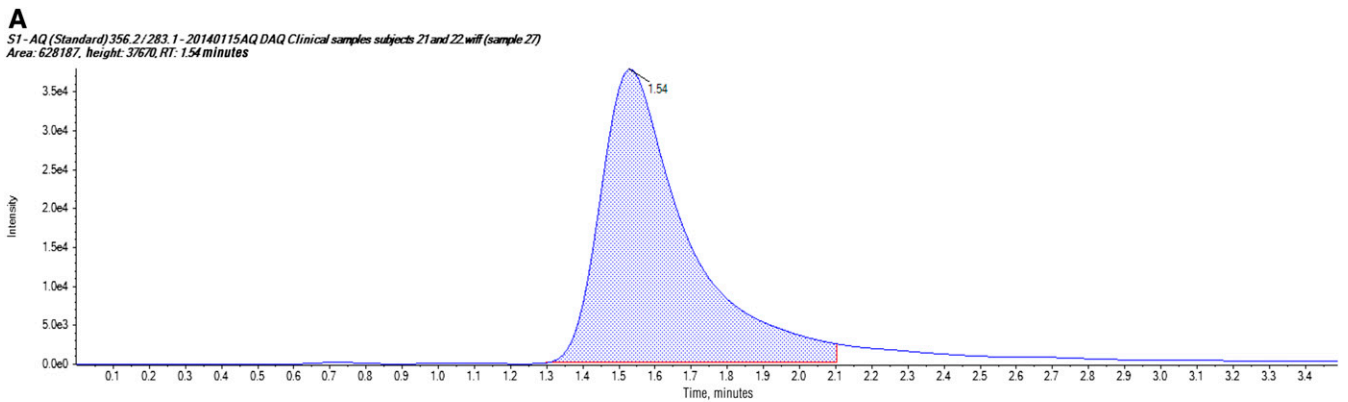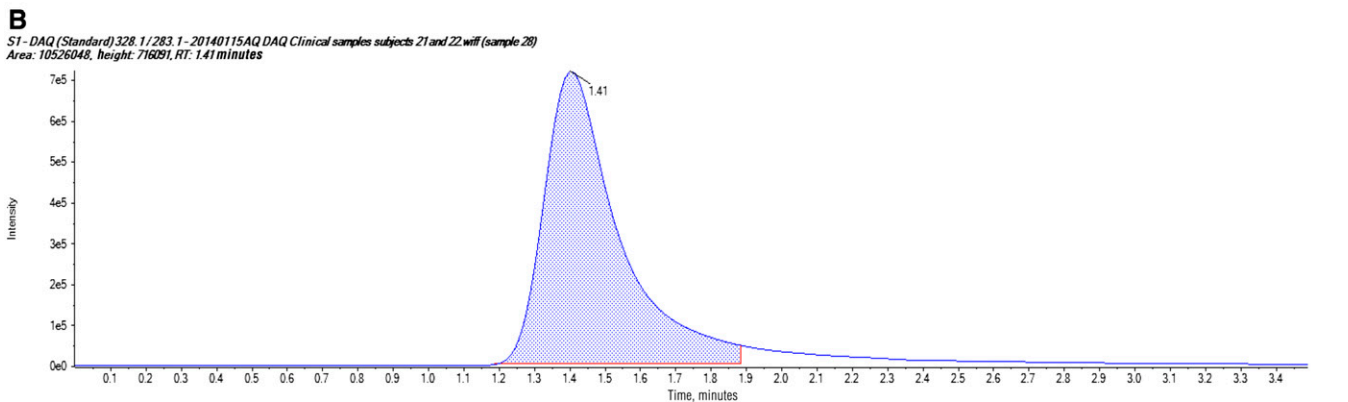

SUPPLEMENTAL FIGURE 4. High calibration standard (AQ 100 ng/mL/DAQ 2,000 ng/mL). (A) AQ. (B) DAQ. AQ = amodiaquine; DAQ = desethylamodiaquine.

**A**

VCP17FO D0 0H- AQ (Unknown) 356.2/283.1-20131120AQ DAQ Clinical samples subjects 15, 16, 17 and 18.wiff (sample 80)  
Area: N/A, height: N/A, RT: N/A minutes

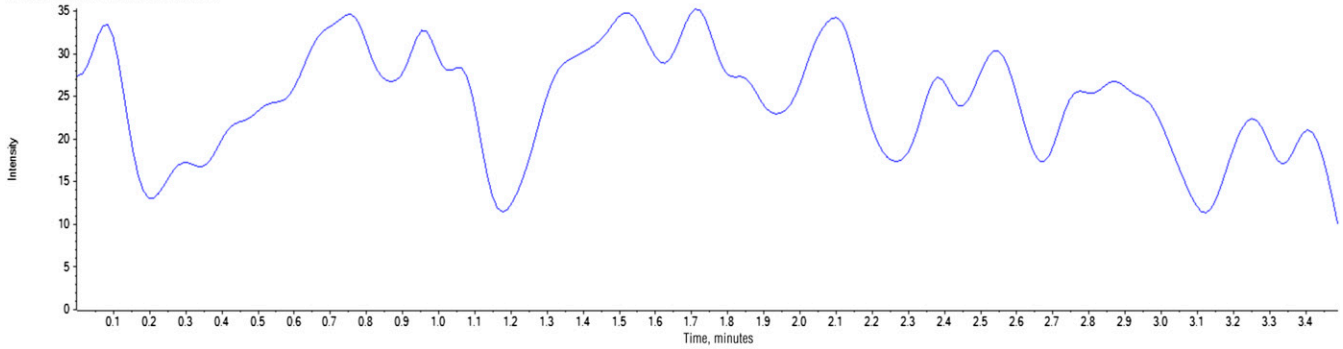

**B**

VCP17FO D0 0H- DAQ (Unknown) 328.1/283.1-20131120AQ DAQ Clinical samples subjects 15, 16, 17 and 18.wiff (sample 80)  
Area: N/A, height: N/A, RT: N/A minutes

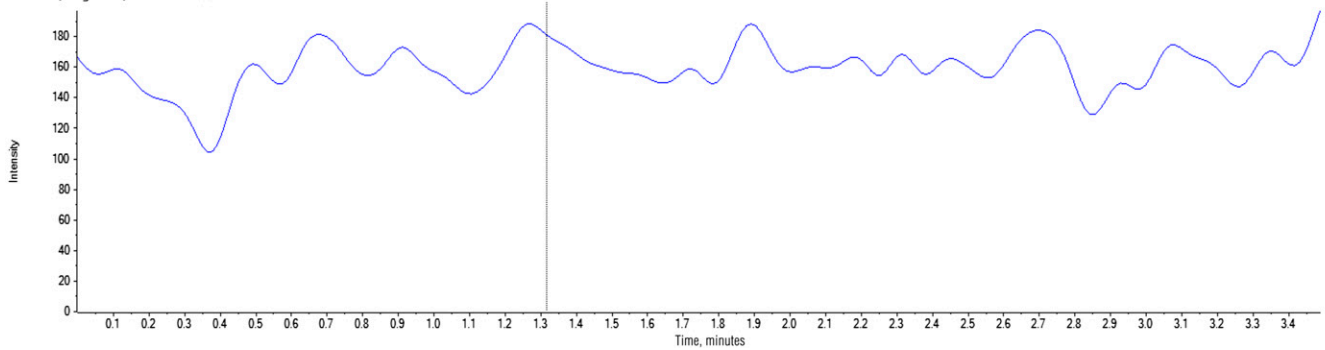

SUPPLEMENTAL FIGURE 5. Subject VCP17FO plasma sample pre-dose. (A) AQ. (B) DAQ. AQ = amodiaquine; DAQ = desethylamodiaquine.

**A**

VCP17FO D0 1H- AQ (Unknown) 356.2/283.1-20131120AQ DAQ Clinical samples subjects 15, 16, 17 and 18.wiff (sample 81)  
Area: 92729, height: 4377, RT: 1.53 minutes

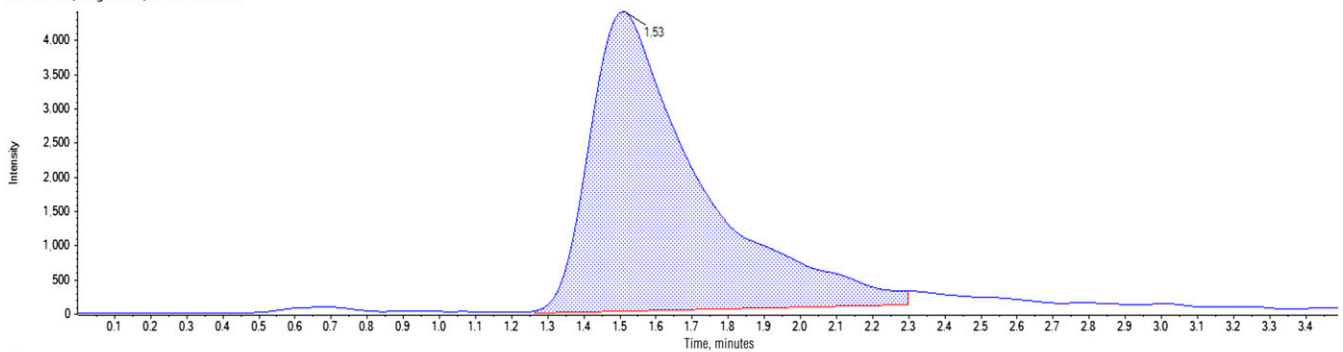

**B**

VCP17FO D0 1H- DAQ (Unknown) 328.1/283.1-20131120AQ DAQ Clinical samples subjects 15, 16, 17 and 18.wiff (sample 81)  
Area: 674140, height: 37766, RT: 1.38 minutes

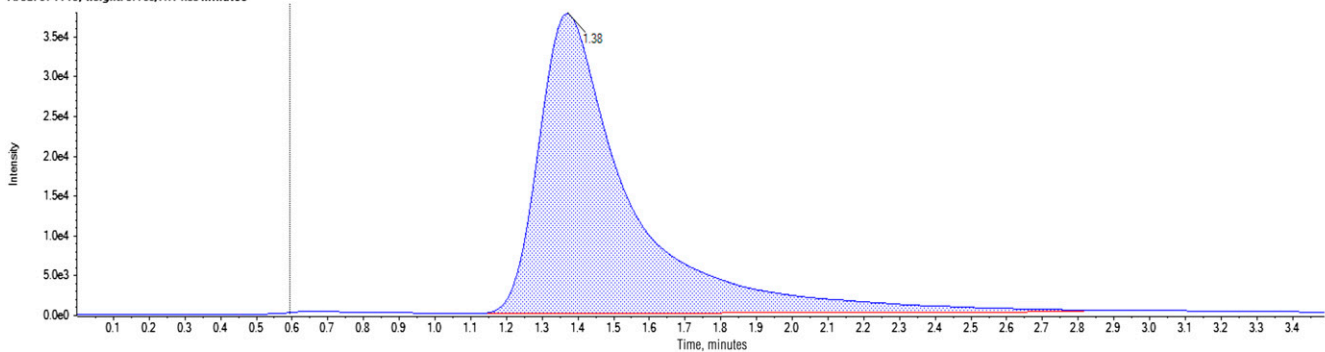

SUPPLEMENTAL FIGURE 6. Subject VCP17FO plasma sample 1 hour post-dose. (A) AQ (23.31 ng/mL). (B) DAQ (186.57 ng/mL). AQ = amodiaquine; DAQ = desethylamodiaquine.

**Method validation. Linearity and reproducibility.**

- Amodiaquine and DAQ inter-day accuracy and precision.

Calibration standards of plasma AQ/DAQ concentrations from 0.391/3.91 to 100/2,000 ng/mL were analyzed over the period of the study analysis (Supplemental Table 1). Good linearity was obtained over this range, with good precision and accuracy.

- For AQ, the LLOQ using 0.05 mL of plasma was 0.391 ng/mL with a CV of 3.46% and an inaccuracy of -0.62%. The quadratic regression equation  $y = ax^2 + bx + c$ , where  $x$  is the amount of drug and  $y$  is the ratio of AQ or DAQ area to internal standard area, was used to determine the concentrations of unknowns and QC samples. A typical regression equation of a calibration curve for AQ was  $y = 2.3011e^{-4}x^2 + 0.1297x + 0.00454$ , where  $r^2 = 0.9981$ .
- For DAQ, the LLOQ using 0.05 mL of plasma was 3.91 ng/mL with a CV of 1.20% and an inaccuracy of 1.55%. A typical regression equation of a calibration curve was  $y = 3.4211e^{-6}x^2 + 0.1526x + 6.7194$ , where  $r^2 = 0.9991$ .

SUPPLEMENTAL TABLE 1  
Inter-day accuracy and precision of AQ/DAQ assay

|                                   | Mean (ng/mL) | SD (ng/mL) | CV (%) | n  | Accuracy (%) |
|-----------------------------------|--------------|------------|--------|----|--------------|
| AQ nominal concentration (ng/mL)  |              |            |        |    |              |
| 0.391                             | 0.39         | 0.01       | 3.46   | 7  | 99.38        |
| 0.781                             | 0.77         | 0.02       | 3.04   | 10 | 98.85        |
| 1.56                              | 1.57         | 0.08       | 5.27   | 10 | 100.38       |
| 3.13                              | 3.11         | 0.14       | 4.55   | 10 | 99.42        |
| 6.25                              | 6.23         | 0.35       | 5.56   | 10 | 99.60        |
| 12.5                              | 12.56        | 0.81       | 6.42   | 10 | 96.86        |
| 25.0                              | 25.08        | 1.23       | 4.91   | 10 | 100.33       |
| 50.0                              | 50.06        | 2.71       | 5.41   | 10 | 100.11       |
| 100                               | 99.64        | 0.77       | 0.78   | 10 | 99.64        |
| DAQ nominal concentration (ng/mL) |              |            |        |    |              |
| 3.91                              | 3.97         | 0.05       | 1.20   | 10 | 101.55       |
| 7.81                              | 7.39         | 0.22       | 2.94   | 9  | 94.64        |
| 15.6                              | 15.11        | 0.54       | 3.58   | 10 | 96.87        |
| 31.3                              | 31.19        | 1.21       | 3.88   | 10 | 99.66        |
| 62.5                              | 62.53        | 2.38       | 3.80   | 10 | 100.05       |
| 125                               | 129.24       | 2.99       | 2.32   | 10 | 103.40       |
| 250                               | 252.87       | 12.90      | 5.10   | 10 | 101.15       |
| 500                               | 506.71       | 25.27      | 4.99   | 10 | 101.34       |
| 1,000                             | 980.58       | 67.78      | 6.91   | 10 | 98.06        |
| 2,000                             | 1,993.44     | 23.37      | 1.17   | 10 | 99.67        |

AQ = amodiaquine; CV = coefficient of variation; DAQ = desethylamodiaquine.

- Amodiaquine and DAQ intraday accuracy and precision

Calibration standards of plasma AQ and DAQ were analyzed in quintuplicate on a single day (see Supplemental Table 2). Good linearity was obtained over this range, with good precision and accuracy.

SUPPLEMENTAL TABLE 2  
Intraday accuracy and precision of DA/DAQ assay

|                                   | Mean (ng/mL) | SD (ng/mL) | CV (%) | n | Accuracy (%) |
|-----------------------------------|--------------|------------|--------|---|--------------|
| AQ nominal concentration (ng/mL)  |              |            |        |   |              |
| 0.391                             | 0.40         | 0.01       | 3.28   | 5 | 101.79       |
| 0.781                             | 0.78         | 0.06       | 7.90   | 5 | 99.87        |
| 1.56                              | 1.45         | 0.04       | 2.74   | 5 | 92.82        |
| 3.13                              | 3.02         | 0.13       | 4.29   | 5 | 96.36        |
| 6.25                              | 6.36         | 0.18       | 2.79   | 5 | 101.82       |
| 12.5                              | 12.95        | 0.56       | 4.29   | 5 | 103.62       |
| 25.0                              | 25.79        | 0.59       | 2.28   | 5 | 103.16       |
| 50.0                              | 51.14        | 1.59       | 3.11   | 5 | 102.28       |
| 100                               | 97.96        | 1.03       | 1.06   | 5 | 97.86        |
| DAQ nominal concentration (ng/mL) |              |            |        |   |              |
| 3.91                              | 3.86         | 0.10       | 2.60   | 5 | 98.67        |
| 7.81                              | 7.74         | 0.12       | 1.61   | 5 | 99.08        |
| 15.6                              | 15.49        | 0.61       | 3.94   | 5 | 99.27        |
| 31.3                              | 31.15        | 0.84       | 2.70   | 5 | 99.52        |
| 62.5                              | 61.66        | 1.81       | 2.94   | 5 | 98.66        |
| 125                               | 126.57       | 2.10       | 1.66   | 5 | 101.26       |
| 250                               | 252.61       | 9.47       | 3.75   | 5 | 101.04       |
| 500                               | 499.39       | 24.55      | 4.92   | 5 | 99.88        |
| 1,000                             | 1,011.95     | 27.43      | 2.71   | 5 | 101.20       |
| 2,000                             | 1,985.18     | 47.33      | 2.38   | 5 | 99.26        |

AQ = amodiaquine; CV = coefficient of variation; DAQ = desethylamodiaquine.

**Quality control plasma samples.**

- Accuracy and precision of QC samples

Results of accuracy and precision of QC samples (low–mid–high concentrations) assayed are shown for AQ and DAQ in Supplemental Table 3.

SUPPLEMENTAL TABLE 3  
Accuracy and precision of AQ/DAQ QC samples

|         | Nominal (ng/mL) | Mean (ng/mL) | SD (ng/mL) | CV (%) | <i>n</i> | Accuracy (%) |
|---------|-----------------|--------------|------------|--------|----------|--------------|
| AQ      |                 |              |            |        |          |              |
| QC low  | 2.34            | 2.51         | 0.17       | 6.62   | 20       | 107.44       |
| QC mid  | 37.50           | 39.11        | 1.40       | 3.59   | 21       | 104.29       |
| QC high | 75.00           | 75.22        | 2.22       | 2.95   | 21       | 100.30       |
| DAQ     |                 |              |            |        |          |              |
| QC low  | 6               | 6.40         | 0.26       | 4.14   | 21       | 106.65       |
| QC mid  | 750             | 781.90       | 26.89      | 3.44   | 21       | 104.25       |
| QC high | 1,500           | 1,513.24     | 31.81      | 2.10   | 21       | 100.88       |

AQ = amodiaquine; CV = coefficient of variation; DAQ = desethylamodiaquine; QC = quality control.

**Uncertainty of measurement of plasma AQ and DAQ.** Uncertainty of measurement estimate for Plasma AQ is at the following concentrations:

- 2.34 ng/mL: 8.74% (2.14–2.55 ng/mL)
- 37.5 mL: 7.23% (34.79–44.73 ng/mL)
- 75 g/mL: 6.06% (70.45–79.55 ng/mL)

Uncertainty of measurement estimate for Plasma DAQ is at the following concentrations:

- 6 ng/mL: 8.24% (5.5–6.5 ng/mL)
- 750 ng/mL: 7.03% (697–803 ng/mL)
- 1,500 ng/mL: 6.32% (1,405–1,595 ng/mL)

### SUPPLEMENTAL MATERIAL 3

#### LC/MS/MS ANALYSIS OF ARN

##### Standards.

- Artemisinin. Worldwide Antimalarial Resistance Network Reference compound.
- Internal standard, SIL DHA. Worldwide Antimalarial Resistance Network Reference compound.

##### Chromatographic conditions.

- Liquid chromatography column: Hypersil Gold C18 100 mm × 2.1 mm I.D. 5 µm, 25005-102130.
- Pre-column: Hypersil Gold C18 10 mm × 2.1 mm I.D. 3 µm, 25005-012101 (changed every 200 samples or earlier if needed).
- Mobile phase flow: 0.5 mL/minute.
- Run time: 3 minutes.
- Mobile phase A: ACN–ammonium acetate 10 mM pH 3.5 (50–50, v/v).
- Mobile phase B: Methanol–ACN (75–25, v/v).

Gradient:

| Total time (minutes) | A (%) | B (%) |
|----------------------|-------|-------|
| 0                    | 60    | 40    |
| 0.3                  | 60    | 40    |
| 0.6                  | 0     | 100   |
| 1.4                  | 0     | 100   |
| 1.8                  | 60    | 40    |
| 3                    | 0     | 100   |

Mass spectrometer conditions:

|             |       |
|-------------|-------|
| Curtain gas | 25    |
| CAD gas     | High  |
| IS (V)      | 5,500 |
| Temp (°C)   | 300   |
| GS1         | 50    |
| GS2         | 50    |
| IHE         | On    |

Mass spectrometry transitions:

| Analyte | Q1 (Da) | Q3 (Da) | Time (ms) | DP (v) | EP (v) | CE (v) | CXP (v) |
|---------|---------|---------|-----------|--------|--------|--------|---------|
| ARN     | 283.088 | 209.4   | 150       | 66     | 10     | 9      | 18      |
| SIL DHA | 307.0   | 168.0   | 150       | 36     | 10     | 23     | 12      |

ARN = artemisinin; DHA = dihydroartemisinin; SIL = stable isotope labeled.

**Subject plasma sample preparation.**

- Calibrators and QCs were prepared by spiking ARN-free citrate phosphate dextrose anticoagulated human plasma (50 µL) with ACN containing internal standard (2 ng/mL SIL DHA in ACN; 200 µL) or blank ACN (200 µL) for the double blank. Calibrators and blanks were then treated as unknowns.
- Subject plasma samples were thawed in a room-temperature circulating water bath and were vortex mixed before analysis.
- Subject or spiked plasma (50 µL) was added to pre-labeled 1.5-mL polypropylene microfuge tubes. To these tubes was added internal standard solution (2 ng/mL SIL DHA in ACN; 200 µL), and the tubes were mixed by vortexing for 1 minute at maximum vortex setting.
- The tubes were then centrifuged (20,817 × g, 5 minutes at 4°C).
- The organic layer (100 µL) was subsequently transferred to a 96-well polypropylene microtitre plate containing 100 µL mobile phase A.
- Inject 10 µL onto the column.

**Calculation of results.** Chromatograms were integrated and processed using Applied Biosystems software (Analyst V1.4.2). Concentrations of ARN in subject plasma samples and QCs were calculated from regression curves of peak area ratios (ARN:SIL DHA) versus analyte concentration using Multiquant 2.1 software. A weighting of (1/x<sup>2</sup>) was used to generate a quadratic regression curve.

**Testing of drug-free plasmas for ion suppression.** Six drug-free plasma samples were tested for matrix effect (ion suppression) to identify a drug-free plasma that showed no identifiable effect on drug quantification. This was performed by infusing a low quantity of ARN (10 ng/mL) while injecting ACN extracts from the six drug-free plasmas. None of the plasmas showed ion suppression and one of these, 2HSB003/09, was used to prepare standards and QC samples.

**Chromatograms.** Typical chromatograms of ARN and the internal standard SIL DHA in plasma are shown in Supplemental Figures 7–12. They are internal standard SIL DHA (Supplemental Figure 7); low-range QC plasma ARN (Supplemental Figure 8); a low calibration standard (Supplemental Figure 9); a high calibration standard (Supplemental Figure 10); subject plasma at time = 0 hour (Supplemental Figure 11); subject plasma at time = 1 hour (Supplemental Figure 12). The retention times for ARN and SIL DHA were approximately 1.30 and 1.19 minutes, respectively.

*IS - SIL - DHA (Standard) 307.0 / 168.0 - 20130406ARN Repeats.wiff (sample 10)*  
Area: 4243, height: 726, RT: 1.19 minutes

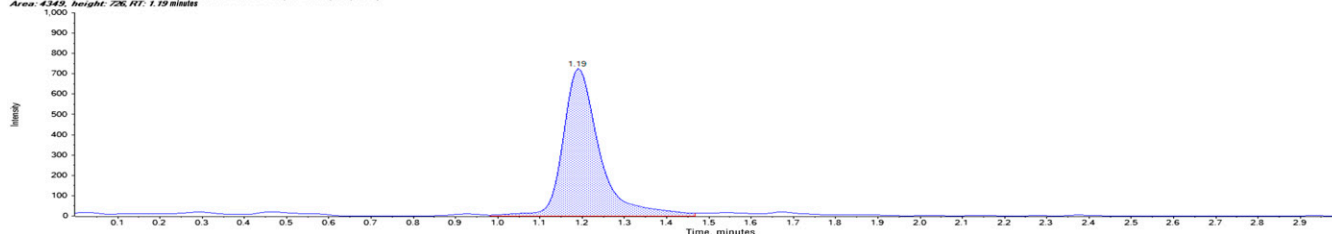

SUPPLEMENTAL FIGURE 7. Internal standard SIL DHA. DHA = dihydroartemisinin; SIL = stable isotope labeled.

*QCL - ARN-2 (Quality Control) 283.1/209.4 - 20130402ARNP17 and P18.wiff (sample 22)*  
Area: 1210, height: 206, RT: 1.30 minutes

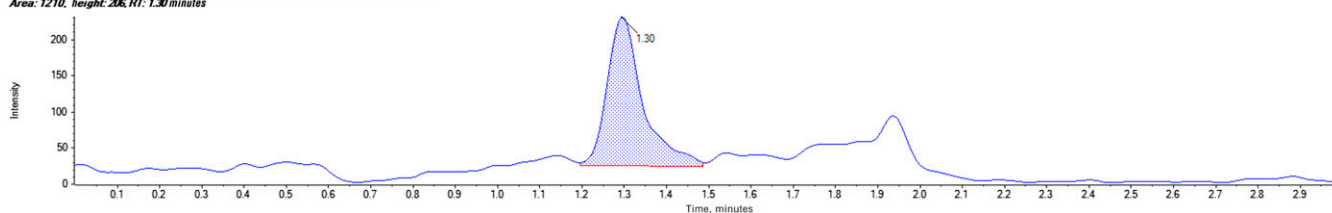

SUPPLEMENTAL FIGURE 8. Quality control (QC) low-range plasma sample QC (ARN 2 ng/mL). ARN = artemisinin.



S7 - ARN-2 (Standard) 283.1/209.4 - 20130402ARN P17 and P18.wiff (sample 18)  
Area: 543, height: 102, RT: 1.31 minutes

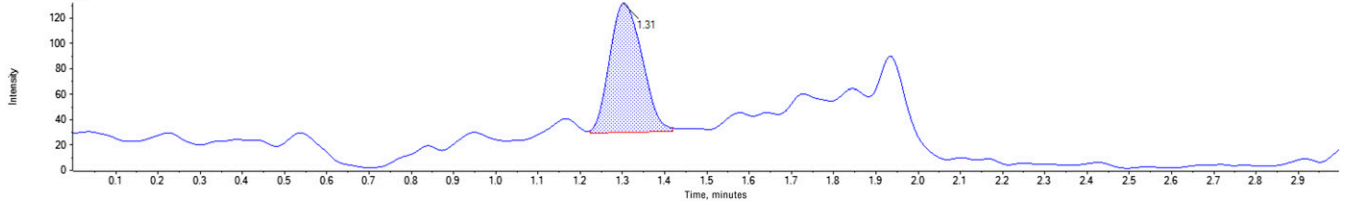

SUPPLEMENTAL FIGURE 9. Low calibration standard (ARN 1 ng/mL). ARN = artemisinin.

S1 - ARN-2 (Standard) 283.1/209.4 - 20130402ARN P17 and P18.wiff (sample 11)  
Area: 468118, height: 84076, RT: 1.31 minutes

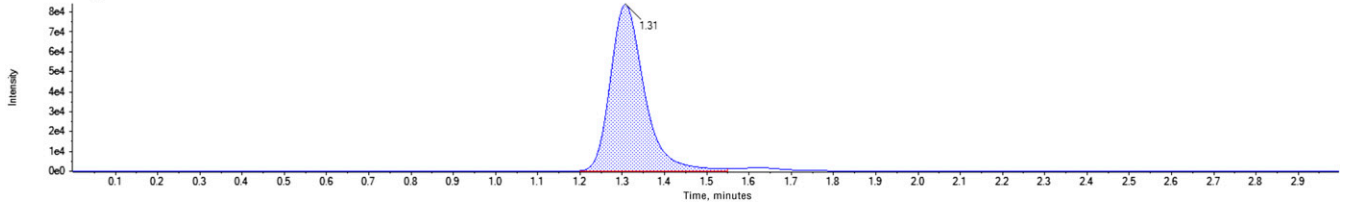

SUPPLEMENTAL FIGURE 10. High calibration standard (ARN 1,000 ng/mL). ARN = artemisinin.

VAP17H D0 0H - ARN-2 (Unknown) 283.1/209.4 - 20130402ARN P17 and P18.wiff (sample 23)  
Area: N/A, height: N/A, RT: N/A minutes

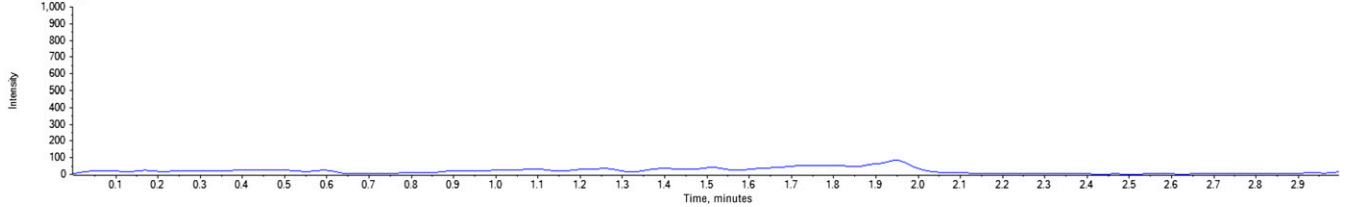

SUPPLEMENTAL FIGURE 11. Subject VAP17H plasma at time = 0 hour.

VAP17H D0 1H - ARN-2 (Unknown) 283.1/209.4 - 20130402ARN P17 and P18.wiff (sample 24)  
Area: 64243, height: 11510, RT: 1.31 minutes

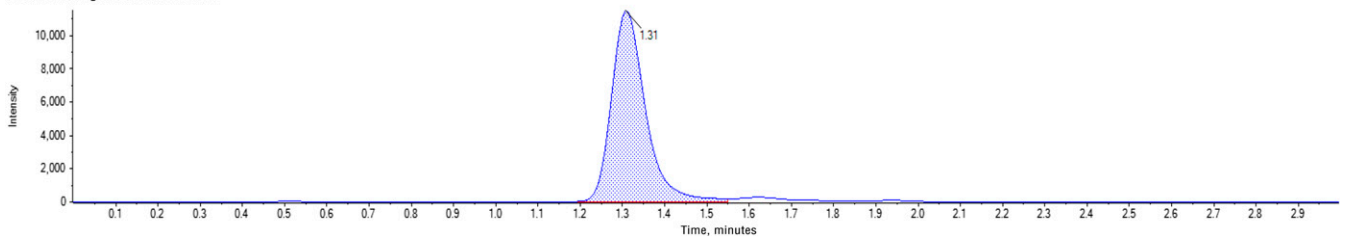

SUPPLEMENTAL FIGURE 12. Subject VAP17H plasma at time = 1 hour (109.32 ng/mL).

**Method validation. Linearity and reproducibility.**

• **Artemisinin inter-day accuracy and precision**

Calibration standards of plasma ARN concentrations from 1 to 1,000 ng/mL analyzed over the period of the study analysis. Good linearity was obtained over this range, with good precision and accuracy.

SUPPLEMENTAL TABLE 4  
Inter-day accuracy and precision of ARN assay

| ARN nominal concentration (ng/mL) | Mean (ng/mL) | SD (ng/mL) | CV%   | n  | Accuracy (%) |
|-----------------------------------|--------------|------------|-------|----|--------------|
| 1,000                             | 1,050.61     | 85.80      | 8.17  | 21 | 105.06       |
| 400                               | 339.95       | 19.20      | 5.65  | 11 | 84.99        |
| 100                               | 99.71        | 4.73       | 4.75  | 11 | 99.71        |
| 40                                | 41.86        | 3.00       | 7.17  | 10 | 104.65       |
| 10                                | 10.08        | 0.56       | 5.52  | 11 | 100.79       |
| 2.5                               | 2.48         | 0.14       | 5.73  | 11 | 99.38        |
| 1                                 | 1.04         | 0.13       | 12.26 | 18 | 104.44       |

ARN = artemisinin; CV = coefficient of variation.

For ARN, the LLOQ using 0.05 mL of plasma was 1 ng/mL with a CV of 12.26% and an inaccuracy of 4.44%. The quadratic regression equation  $y = ax^2 + bx + c$ , where  $x$  is the amount of drug and  $y$  is the ratio of ARN area to internal standard area, was used to determine the concentrations of unknowns and QC samples. A typical regression equation of a calibration curve was  $y = -5.071x^2 + 0.254x + 0.0208$ , where  $r^2 = 0.9995$ .

• **Artemisinin intraday accuracy and precision**

Calibration standards of plasma ARN were analyzed in quintuplicate on a single day (Supplemental Table 5). Good linearity was obtained over this range, with good precision and accuracy.

SUPPLEMENTAL TABLE 5  
Intraday accuracy and precision of ARN assay

| ARN nominal concentration (ng/mL) | Mean (ng/mL) | SD (ng/mL) | CV (%) | <i>n</i> | Accuracy (%) |
|-----------------------------------|--------------|------------|--------|----------|--------------|
| 1,000                             | 913.37       | 34.65      | 3.79   | 5        | 91.34        |
| 400                               | 349.81       | 24.72      | 7.07   | 5        | 87.45        |
| 100                               | 105.37       | 5.30       | 5.03   | 5        | 105.37       |
| 40                                | 41.92        | 1.60       | 3.81   | 5        | 104.81       |
| 10                                | 9.82         | 0.50       | 5.09   | 5        | 98.24        |
| 2.5                               | 2.46         | 0.16       | 6.56   | 5        | 98.48        |
| 1                                 | 1.06         | 0.09       | 8.11   | 5        | 106.20       |

ARN = artemisinin; CV = coefficient of variation.

**Accuracy and precision of QC samples.**

- Results of accuracy and precision of QC samples (low–mid–high concentrations) assayed are shown for ARN in Supplemental Table 6.

SUPPLEMENTAL TABLE 6  
Accuracy and precision of ARN QC samples

| ARN     | Nominal (ng/mL) | Mean (ng/mL) | SD (ng/mL) | CV (%) | <i>n</i> | Accuracy (%) |
|---------|-----------------|--------------|------------|--------|----------|--------------|
| QC High | 500             | 462.59       | 37.39      | 8.08   | 22       | 92.52        |
| QC Mid  | 20              | 18.22        | 0.75       | 4.09   | 22       | 91.11        |
| QC Low  | 2               | 1.95         | 0.14       | 7.12   | 22       | 97.43        |

ARN = artemisinin; CV = coefficient of variation; QC = quality control.

SUPPLEMENTAL MATERIAL 4

LC/MS/MS ANALYSIS OF ARS AND DHA

**Standards.**

- Artesunate, Lot no. MB17174, Manufacture Code 256283AD.
- Dihydroartemisinin, Lot no. DHN060306 (Supplied by DK Pharma, Hanoi, Vietnam).
- Internal standards, SIL ARS and SIL DHA. Worldwide Antimalarial Resistance Network Reference compound.

**Chromatographic conditions.**

- Column: Thermo Fisher Hypersil Gold (100 mm × 2.1 mm; 5 μm).
- Run time: 5.5 minutes.
- Mobile phase A: 5 mM NH<sub>4</sub> acetate, 0.5% acetic acid, and 50% ACN.
- Mobile phase B: ACN.

Gradient:

| Time (minutes) | Module            | Events               | Parameter |
|----------------|-------------------|----------------------|-----------|
| 0.30           | Pumps             | Pump B concentration | 0.0       |
| 0.80           | Pumps             | Pump B concentration | 100       |
| 2.20           | Pumps             | Pump B concentration | 100       |
| 2.40           | Pumps             | Total flow           | 1         |
| 3.30           | Pumps             | Total flow           | 1         |
| 3.50           | Pumps             | Pump B concentration | 0         |
| 3.50           | Pumps             | Total flow           | 0.75      |
| 5.20           | Pumps             | Pump B concentration | 0.0       |
| 5.40           | Pumps             | Total flow           | 0.5       |
| 5.50           | System controller | Stop                 | –         |

Mass spectrometer conditions:

|             |       |
|-------------|-------|
| Curtain gas | 25    |
| CAD gas     | High  |
| IS (V)      | 5,500 |
| Temp (°C)   | 300   |
| GS1         | 50    |
| GS2         | 50    |
| IHE         | On    |

Mass spectrometry transitions:

| Analyte | Q1 (Da) | Q3 (Da) | Time (ms) | DP (v) | EP (v) | CE (v) | CXP (v) |
|---------|---------|---------|-----------|--------|--------|--------|---------|
| ARS     | 402.1   | 267.1   | 100       | 46     | 10     | 15     | 22      |
| DHA     | 302.2   | 163.2   | 100       | 41     | 10     | 23     | 14      |
| SIL ARS | 406.0   | 163.0   | 100       | 40     | 10     | 16     | 12      |
| SIL DHA | 307.0   | 168.0   | 00        | 36     | 10     | 23     | 12      |

ARS = artesunate; DHA = dihydroartemisinin; SIL = stable isotope labeled.

**Subject plasma sample preparation.**

- Calibrators and QCs were prepared by spiking ARS- and DHA-free lithium heparin anticoagulated human plasma (50 µL) with ACN containing internal standards (2 ng/mL SIL ARS and 10 ng/mL SIL DHA in ACN; 200 µL) or blank ACN (200 µL) for the double blank. Calibrators and blanks were then treated as unknowns.
- Subject plasma samples were thawed in a room-temperature circulating water bath and were vortex mixed before analysis.
- Subject or spiked plasma (50 µL) was added to pre-labeled 1.5-mL polypropylene microfuge tubes. To these tubes was added an internal standard solution (2 ng/mL SIL ARS and 10 ng/mL SIL DHA in ACN; 200 µL), and the tubes were mixed by vortexing for 1 minute at maximum vortex setting.
- The tubes were then centrifuged (20,817 × g, 5 minutes at 4°C).
- The organic layer (100 µL) was subsequently transferred to a 96-well polypropylene microtitre plate containing 100 µL of 0.1% formic acid and the assay plate was sealed with a silicone mat.
- Inject 10 µL onto the column.

**Calculation of results.** Chromatograms were integrated and processed using Applied Biosystems software (Analyst V1.4.2). Concentrations of DHA and ARS in subject plasma samples and QCs were calculated from regression curves of peak area ratios (DHA:SIL DHA and ARS:SIL ARS) versus analyte concentration using Multiquant 2.1 software. A weighting of (1/x<sup>2</sup>) was used to generate a quadratic regression curve.

**Testing of drug-free plasmas for ion suppression.** Six drug-free plasma samples were tested for matrix effect (ion suppression) to identify a drug-free plasma that showed no identifiable effect on drug quantification. This was performed by infusing a low quantity of AS (10 ng/mL) and DHA (10 ng/mL) while injecting mobile phase extracts from the six drug-free plasmas. None of the plasmas showed ion suppression and one of these, 2HSB003/09, was used to prepare standards and QC samples.

**Chromatograms.**

- Typical chromatograms of ARS, DHA, and the internal standards SIL ARS and SIL DHA in plasma are shown in Supplemental Figures 13–18. They are internal standards SIL ARS and SIL DHA (Supplemental Figure 13); low-range QC plasma ARS and DHA (Supplemental Figure 14); a low calibration standard (Supplemental Figure 15); a high calibration standard (Supplemental Figure 16); subject plasma sample pre-dose (Supplemental Figure 17); subject plasma sample at 1 hour post-dose (Supplemental Figure 18).
- The retention times for ARS, DHA, SIL ARS, and SIL DHA were approximately 1.22, 1.06, 1.40, and 1.21 minutes, respectively.

**A**

*B-SIL-ARS (Unknown) 406.0 / 163.0 - 20130211ARS DHA Coarsucam P1 and 2.wiff (sample 2)*  
 Area: 3702, height: 708, RT: 1.40 minutes

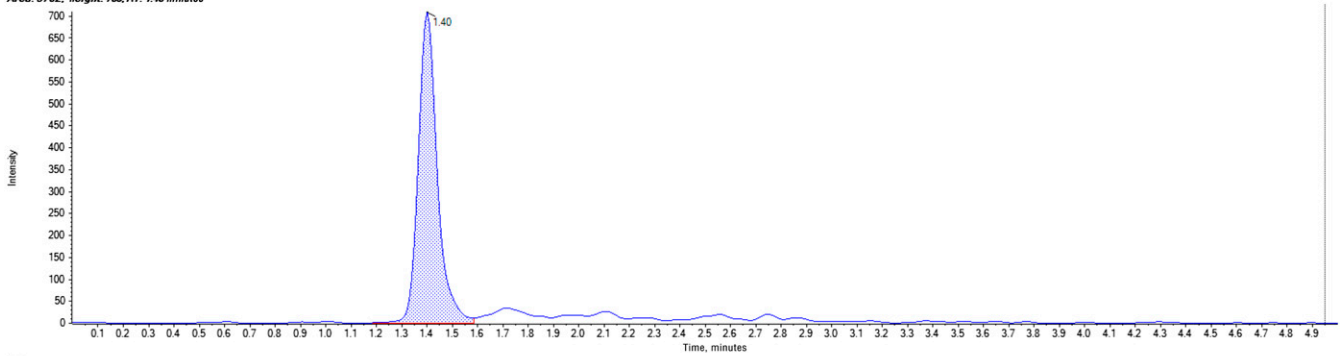**B**

*B-SIL-DHA2 (Unknown) 307.0 / 168.0 - 20130211ARS DHA Coarsucam P1 and 2.wiff (sample 2)*  
 Area: 2186, height: 378, RT: 1.21 minutes

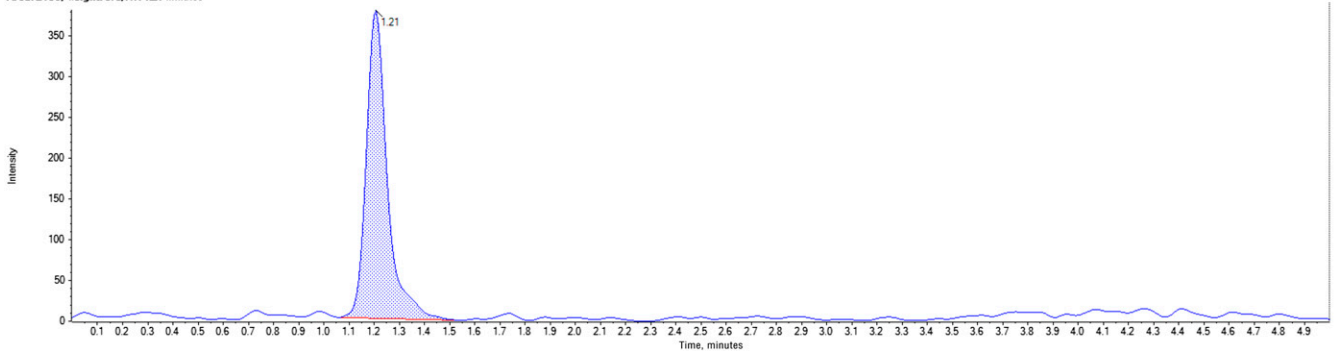

SUPPLEMENTAL FIGURE 13. Internal standards of SIL ARS and SIL dihydroartemisinin (DHA). (A) SIL ARS (2 ng/mL). (B) SIL DHA (10 ng/mL). ARS = artesunate; SIL = stable isotope labeled.

**A**

*QCL-ARS (Quality Control) 402.0 / 267.0 - 20130219ARS DHA Coarsucam P11 and 12.wiff (sample 44)*  
 Area: 2997, height: 508, RT: 1.22 minutes

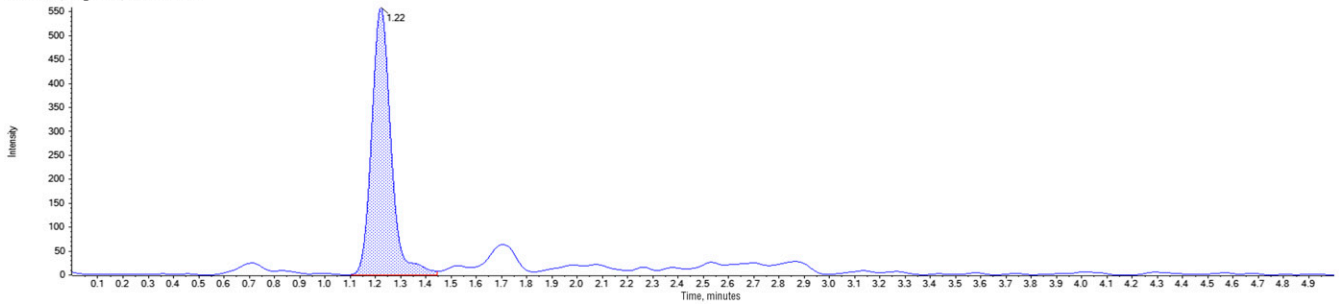**B**

*QCL-DHA (Quality Control) 302.0 / 163.0 - 20130219ARS DHA Coarsucam P11 and 12.wiff (sample 44)*  
 Area: 4248, height: 757, RT: 1.06 minutes

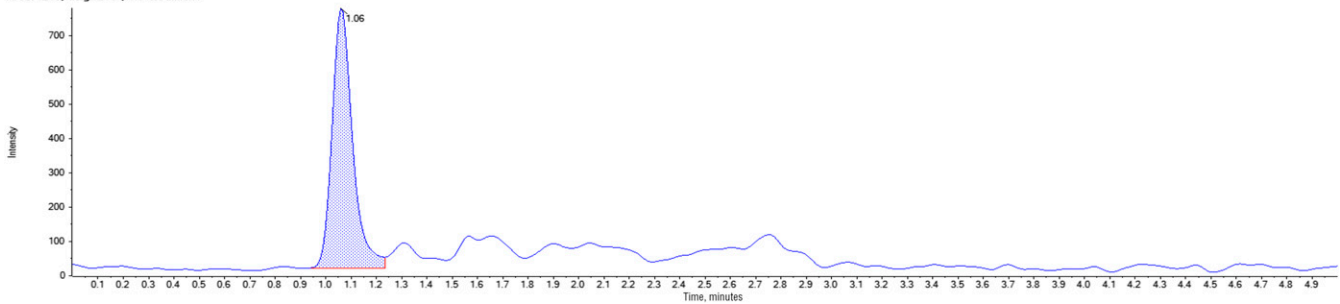

SUPPLEMENTAL FIGURE 14. Quality control (QC) low-range plasma sample (ARS 2.9 ng/mL; dihydroartemisinin (DHA) 5.87 ng/mL). (A) QC low ARS. (B) QC low DHA. ARS = artesunate.

**A**

S2 - ARS (Standard) 402.0 / 267.0 - 20130219ARS DHA Coarsucam P11 and 12.wiff (sample 11)  
Area: 1263, height: 233, RT: 1.22 minutes

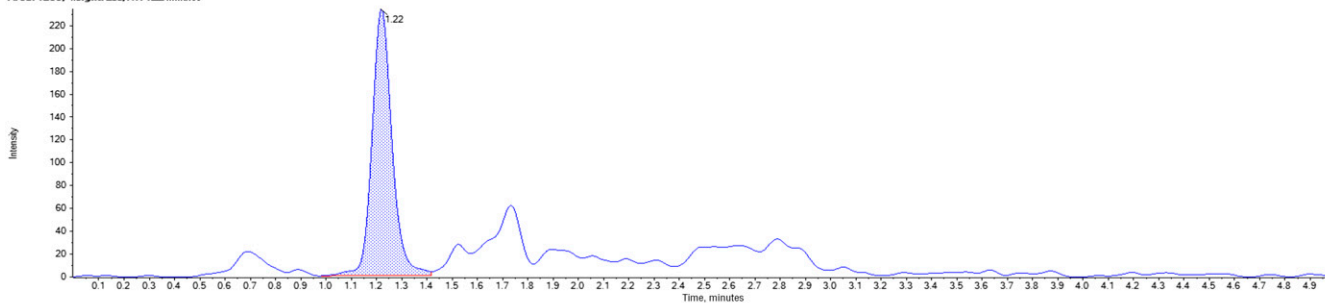

**B**

S2 - DHA (Standard) 302.0 / 163.0 - 20130219ARS DHA Coarsucam P11 and 12.wiff (sample 11)  
Area: 2100, height: 377, RT: 1.06 minutes

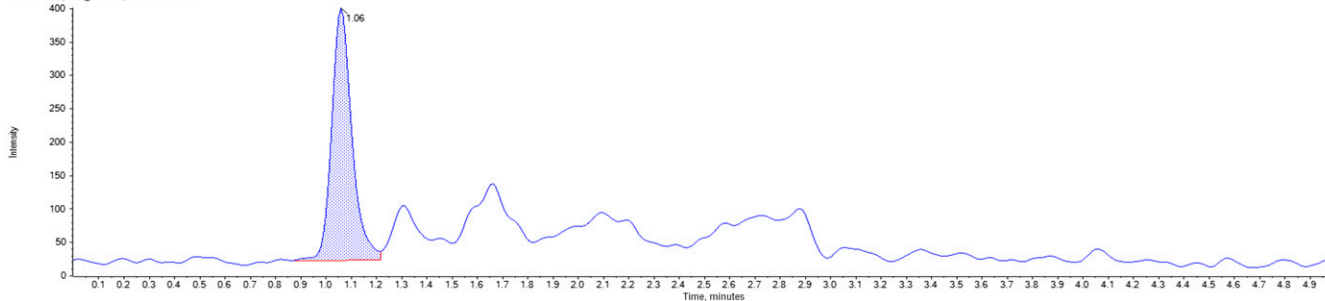

SUPPLEMENTAL FIGURE 15. Low calibration standard (ARS 1.19 ng/mL; dihydroartemisinin (DHA) 1.96 ng/mL). (A) ARS. (B) DHA. ARS = artesunate.

**A**

S7 - ARS (Standard) 402.0 / 267.0 - 20130219ARS DHA Coarsucam P11 and 12.wiff (sample 17)  
Area: 687508, height: 127142, RT: 1.22 minutes

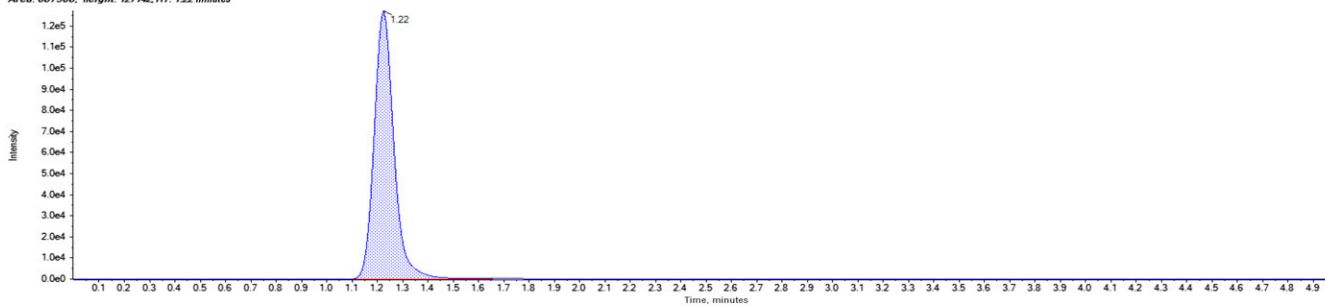

**B**

S7 - DHA (Standard) 302.0 / 163.0 - 20130219ARS DHA Coarsucam P11 and 12.wiff (sample 17)  
Area: 1154614, height: 202396, RT: 1.06 minutes

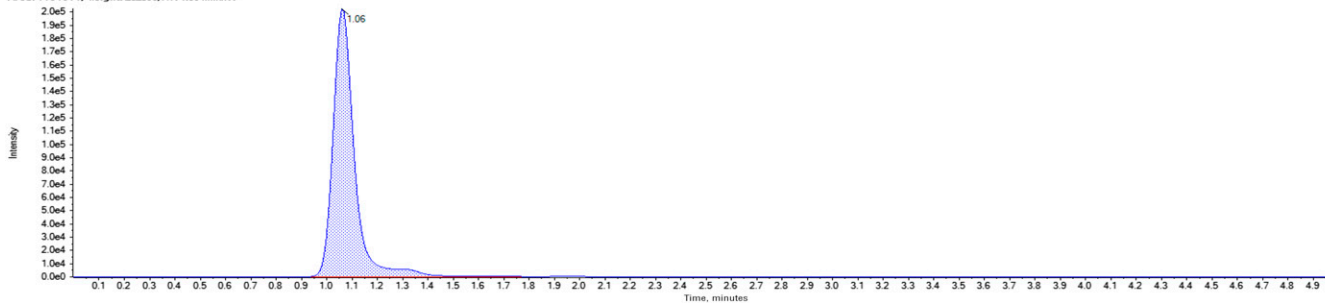

SUPPLEMENTAL FIGURE 16. High calibration standard (ARS 728 ng/mL; dihydroartemisinin (DHA) 2,500 ng/mL). (A) ARS. (B) DHA. ARS = artesunate.

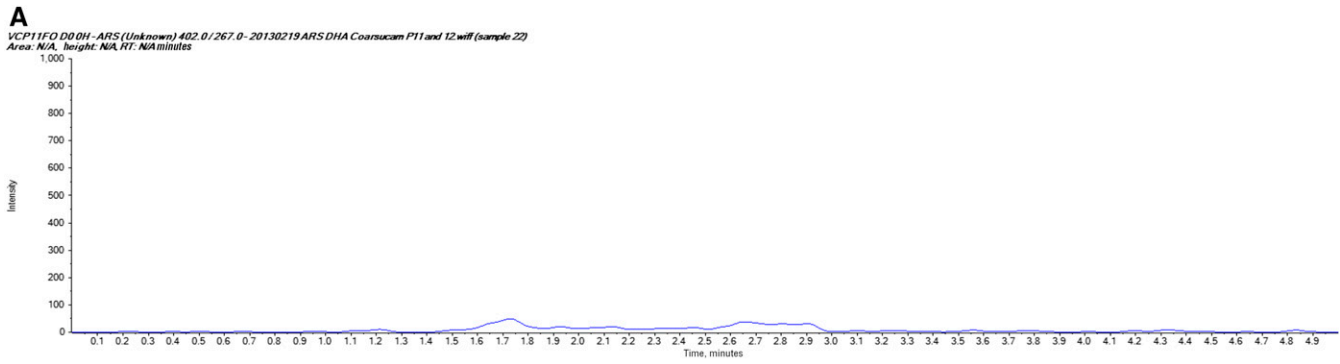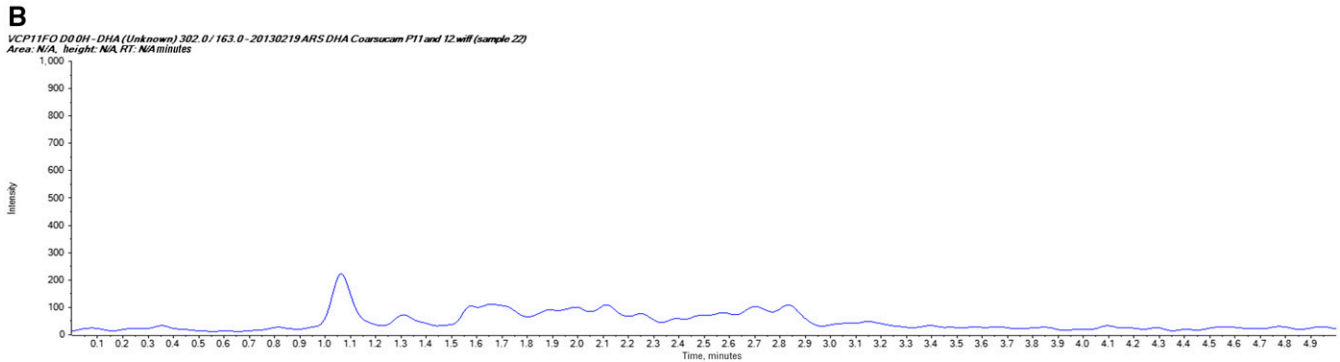

SUPPLEMENTAL FIGURE 17. Subject VCP11FO plasma sample pre-dose. (A) ARS. (B) dihydroartemisinin (DHA). ARS = artesunate.

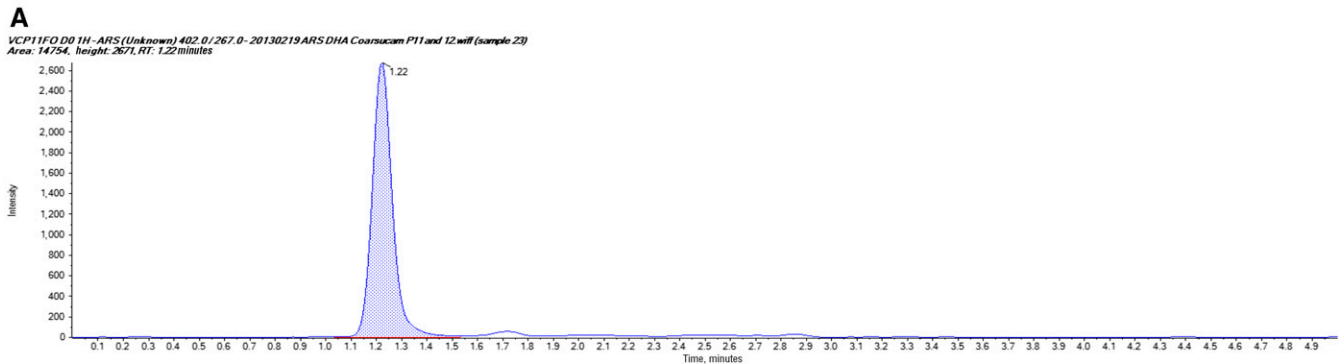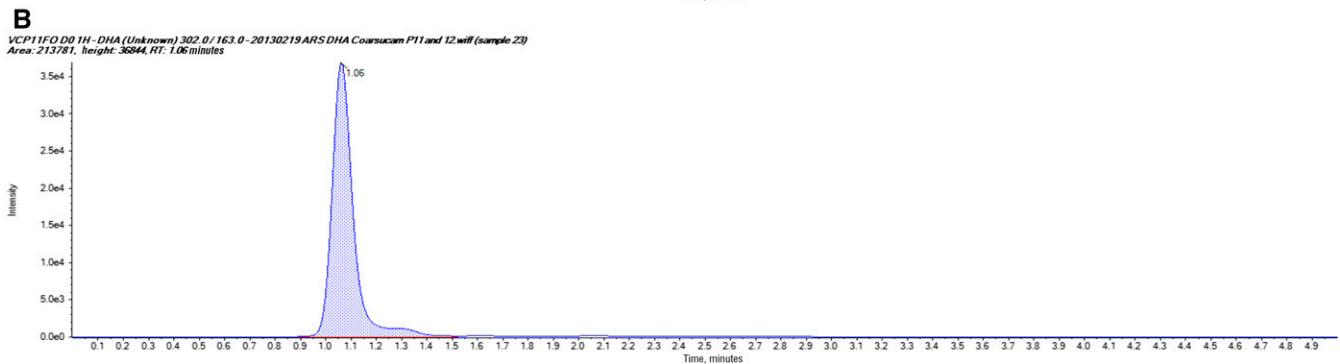

SUPPLEMENTAL FIGURE 18. Subject VCP11FO plasma sample 1 hour post-dose. (A) ARS. (B) dihydroartemisinin (DHA). ARS = artesunate.

**Method validation. Linearity and reproducibility.**

• **Artesunate and DHA inter-day accuracy and precision**

Calibration standards of plasma ARS and DHA concentrations from 1.19/1.96 to 728/2,500 ng/mL were analyzed over the period of the study (Supplemental Table 7). Good linearity was obtained over this range, with good precision and accuracy.

SUPPLEMENTAL TABLE 7  
Inter-day accuracy and precision of ARS/DHA assay

|                                   | Mean (ng/mL) | SD (ng/mL) | CV (%) | n  | Accuracy (%) |
|-----------------------------------|--------------|------------|--------|----|--------------|
| ARS nominal concentration (ng/mL) |              |            |        |    |              |
| 1.19                              | 1.19         | 0.10       | 8.65   | 23 | 99.89        |
| 3.86                              | 4.00         | 0.20       | 4.99   | 17 | 103.66       |
| 21.2                              | 20.81        | 1.36       | 6.52   | 17 | 98.18        |
| 69                                | 67.67        | 3.96       | 5.86   | 17 | 98.07        |
| 224                               | 223.57       | 11.01      | 4.92   | 17 | 99.81        |
| 728                               | 729.92       | 23.79      | 3.26   | 28 | 100.26       |
| DHA nominal concentration (ng/mL) |              |            |        |    |              |
| 1.96                              | 1.90         | 0.28       | 14.48  | 21 | 97.06        |
| 7.82                              | 7.97         | 0.87       | 10.89  | 16 | 101.94       |
| 39.1                              | 39.30        | 2.49       | 6.34   | 17 | 100.51       |
| 156                               | 156.29       | 10.28      | 6.58   | 16 | 100.19       |
| 625                               | 632.62       | 62.46      | 9.87   | 17 | 101.22       |
| 2,500                             | 2,499.08     | 93.88      | 3.76   | 27 | 99.96        |

ARS = artesunate; CV = coefficient of variation; DHA = dihydroartemisinin.

- For ARS, the LLOQ using 0.05 mL of plasma was 1.19 ng/mL with a CV of 8.65% and an inaccuracy of -0.11%. The quadratic regression equation  $y = ax^2 + bx + c$ , where  $x$  is the amount of drug and  $y$  is the ratio of ARS or DHA area to internal standard area, was used to determine the concentrations of unknowns and QC samples. A typical regression equation of a calibration curve was  $y = -5.071x^2 + 0.254x + 0.0208$ , where  $r^2 = 0.9995$ .
- For DHA, the LLOQ using 0.05 mL of plasma was 1.96 ng/mL with a CV of 14.48% and an inaccuracy of -2.94%. A typical regression equation of a calibration curve was  $y = -1.427e^{-5}x^2 + 0.3065x + 0.5201$ , where  $r^2 = 0.9978$ .

• **Artesunate and DHA intraday accuracy and precision**

Calibration standards of plasma ARS and DHA were analyzed in quintuplicate on a single day (Supplemental Table 8). Good linearity was obtained over this range, with good precision and accuracy.

SUPPLEMENTAL TABLE 8  
Intraday accuracy and precision of ARS/DHA assay

|                                   | Mean (ng/mL) | SD (ng/mL) | CV (%) | n | Accuracy (%) |
|-----------------------------------|--------------|------------|--------|---|--------------|
| ARS nominal concentration (ng/mL) |              |            |        |   |              |
| 1.19                              | 1.22         | 0.03       | 2.55   | 5 | 102.69       |
| 3.86                              | 3.91         | 0.23       | 6.00   | 5 | 101.30       |
| 21.2                              | 20.92        | 1.44       | 6.88   | 5 | 98.68        |
| 69                                | 66.07        | 2.37       | 3.59   | 5 | 95.75        |
| 224                               | 228.46       | 10.90      | 4.77   | 5 | 101.99       |
| 728                               | 726.30       | 11.09      | 1.53   | 5 | 99.77        |
| DHA nominal concentration (ng/mL) |              |            |        |   |              |
| 1.96                              | 1.97         | 0.15       | 7.54   | 5 | 100.31       |
| 7.82                              | 8.33         | 0.40       | 4.83   | 5 | 106.55       |
| 39.1                              | 38.52        | 2.77       | 7.20   | 5 | 98.51        |
| 156                               | 153.34       | 4.99       | 3.25   | 5 | 98.30        |
| 625                               | 591.28       | 38.93      | 6.58   | 5 | 94.61        |
| 2,500                             | 2,545.61     | 45.38      | 1.78   | 5 | 101.82       |

ARS = artesunate; CV = coefficient of variation; DHA = dihydroartemisinin.

**Quality control plasma samples.**

• **Accuracy and precision of QC samples**

Results of accuracy and precision of QC samples (low-mid-high concentrations) assayed are shown for DHA and ARS in Supplemental Table 9.

SUPPLEMENTAL TABLE 9  
Accuracy and precision of ARS/DHA QC samples

|         | Nominal (ng/mL) | Mean (ng/mL) | SD (ng/mL) | CV (%) | n  | Accuracy (%) |
|---------|-----------------|--------------|------------|--------|----|--------------|
| ARS     |                 |              |            |        |    |              |
| QC low  | 2.9             | 3.03         | 0.21       | 6.85   | 29 | 104.38       |
| QC mid  | 51.7            | 51.28        | 3.25       | 6.35   | 29 | 99.18        |
| QC high | 546             | 552.43       | 30.02      | 5.43   | 29 | 101.18       |
| DHA     |                 |              |            |        |    |              |
| QC low  | 5.87            | 5.77         | 0.61       | 10.53  | 29 | 98.30        |
| QC mid  | 117             | 120.69       | 11.69      | 9.68   | 29 | 103.15       |
| QC high | 1,880           | 1,871.77     | 134.88     | 7.21   | 29 | 99.56        |

ARS = artesunate; CV = coefficient of variation; DHA = dihydroartemisinin; QC = quality control.

## SUPPLEMENTAL MATERIAL 5

### LC/MS/MS ANALYSIS OF PPQ

#### Standards.

- Piperazine as tetraphosphate salt. Worldwide Antimalarial Resistance Network Reference compound.
- Internal standard: [<sup>2</sup>H<sub>6</sub>]-PPQ (SIL PPQ). Worldwide Antimalarial Resistance Network Reference compound.

#### Chromatographic conditions.

- Column: Gemini C-18 NX 5 $\mu$  column, 50 mm  $\times$  4.6 mm. (Phenomenex) with a Gemini C-18 NX 4 mm  $\times$  2 mm I.D. guard column (Phenomenex) maintained at 30°C in a column oven.
- The mobile phase consisted of an isocratic mix in the ratio 15:85 of pump A 2.5 M ammonium bicarbonate pH 10 and pump B ACN pumped at a combined flow rate of 0.5 mL/minute.
- Samples were maintained at 4°C in a cooled autosampler before injection.
- Needle rinse was 30% ACN with 1% formic acid.

#### Mass spectrometer conditions.

- Mass transitions were monitored using MRM in electrospray ionisation (ESI) positive mode at 535 $\rightarrow$ 288 and 535 $\rightarrow$ 260 for PPQ and 541 $\rightarrow$ 294 for SIL PPQ.
- Source conditions were DP 121v, EP10v, CE47v, CXP 18v, curtain gas 35, collision gas medium, ion source gas1 50, ion source gas2 45, ion spray voltage 5500, interface heater on, and temperature 600.
- Data were acquired using ABSciex Analyst<sup>®</sup> software v1.51.

#### Subject plasma sample preparation.

- In a 1.8-mL polypropylene microcentrifuge tube containing 50  $\mu$ L of sample, spiked calibrator or QC plasma was added to 100  $\mu$ L of 0.05 M carbonate buffer pH 10, and then 20  $\mu$ L of internal standard (SIL PPQ IS2) was added and given a short vortex mix.
- Six hundred microliters of methyl-*tert*-butyl ether was added to each tube and vortex mixed for 1 minute. The tubes were centrifuged at 14,000  $\times$  *g* for 5 minutes in a refrigerated microcentrifuge set at 4°C.
- Four hundred and fifty microliters of supernatant was transferred to a clean 1.8-mL microcentrifuge tube and evaporated to dryness at 50°C under a stream of instrument-grade air.
- The residue was reconstituted with 100  $\mu$ L of mobile phase and vortex mixed for 1 minute. The contents were transferred to a 96-well polypropylene analysis plate sealed with a silicone sealing mat and placed in the autosampler, 5  $\mu$ L was injected on the column.

#### Calculation of results.

- Chromatograms were integrated and processed using the ABSciex MultiQuant<sup>®</sup> software version 2.1.
- Concentrations of PPQ in plasma were calculated from quadratic regression curves of peak area ratios (PPQ:SIL PPQ) versus analyte concentration. A weighting of (1/*x*<sup>2</sup>) was used.

**Testing of drug-free plasmas for ion suppression.** Six drug-free plasma samples were tested for matrix effect (ion suppression) to identify a drug-free plasma that showed no identifiable effect on drug quantitation. This was performed by infusing a low quantity of PPQ (10 ng/mL) while injecting mobile phase extracts from the six drug-free plasmas. None of the plasmas showed ion suppression and one of these, 2HSB003/09, was used to prepare standards and QC samples.

**Chromatograms.** Typical chromatograms of PPQ and the internal standard SIL PPQ in plasma are shown in Supplemental Figures 19–25. They are a low-range QC plasma nominal concentration PPQ 1 ng/mL (Supplemental Figure 19); a mid-range QC plasma nominal concentration PPQ 50 ng/mL (Supplemental Figure 20); a spiked DFP PPQ concentration 0.5 ng/mL (Supplemental Figure 21); a spiked DFP PPQ concentration 1,000 ng/mL (Supplemental Figure 22); plasma samples collected from a volunteer (VNAP02) on day 0 before dosing (Supplemental Figure 23); and VNAP02 plasma samples collected at 3 hours (Supplemental Figure 24) and 12 hours (Supplemental Figure 25) after the administration of Artequick (two tablets; 62.5–375 mg PPQ per tablets, daily for 3 days). The retention times for PPQ and SIL PPQ were approximately at 0.7 and 0.75 minutes, respectively.

QCL - PPQ (quality control) 535.0 / 288.0 - 20121003a VAP13\_14H.wiff (sample 45)  
Area: 4829, height: 676, RT: 0.76 minutes

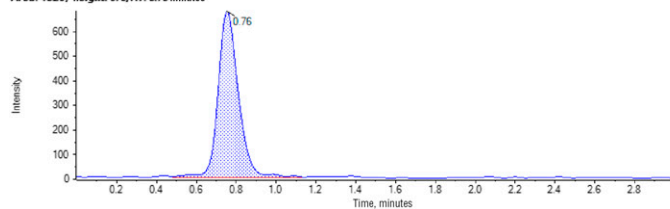

QCL - SIL-PPQ (quality control) 541.0 / 294.0 - 20121003a VAP13\_14H.wiff (sample 45)  
Area: 27542, height: 4050, RT: 0.75 minutes

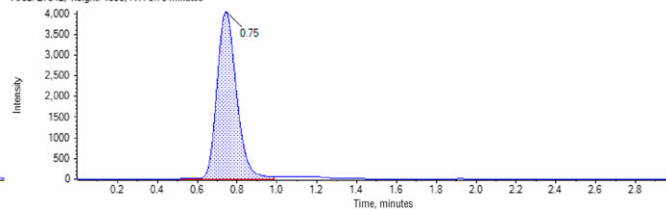

SUPPLEMENTAL FIGURE 19. Quality control (QC) low-range plasma sample (PPQ 1 ng/mL). PPQ = piperazine.



QCM - PPQ (quality control) 535.0 / 288.0 - 20121003a VAP13\_14H.wiff (sample 47)  
Area: 270472, height: 39609, RT: 0.76 minutes

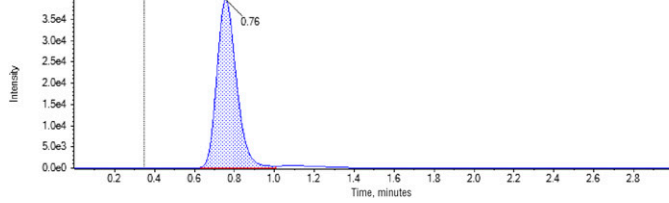

QCM - SIL-PPQ (quality control) 541.0 / 294.0 - 20121003a VAP13\_14H.wiff (sample 47)  
Area: 22797, height: 3313, RT: 0.75 minutes

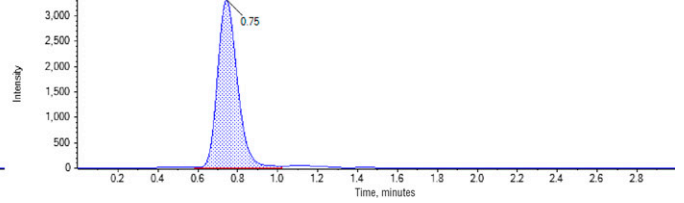

SUPPLEMENTAL FIGURE 20. Quality control (QC) mid-range plasma sample (PPQ 100 ng/mL). PPQ = piperazine.

0.5 - PPQ (Standard) 535.0 / 288.0 - 20121003a VAP13\_14H.wiff (sample 42)  
Area: 1453, height: 217, RT: 0.76 minutes

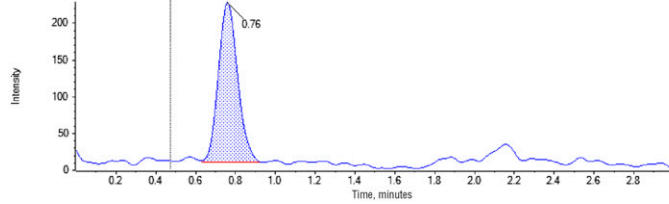

0.5 - SIL-PPQ (standard) 541.0 / 294.0 - 20121003a VAP13\_14H.wiff (sample 42)  
Area: 12760, height: 1881, RT: 0.75 minutes

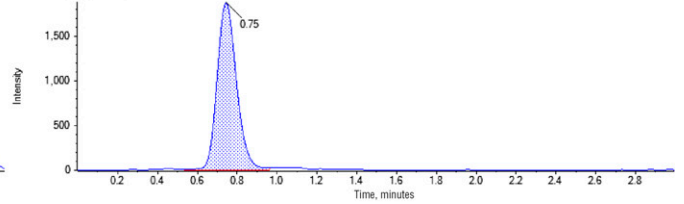

SUPPLEMENTAL FIGURE 21. Low calibration standard (PPQ 0.5 ng/mL). PPQ = piperazine.

1000 - PPQ (Standard) 535.0 / 288.0 - 20121003a VAP13\_14H.wiff (sample 34)  
Area: 2415276, height: 35268, RT: 0.76 minutes

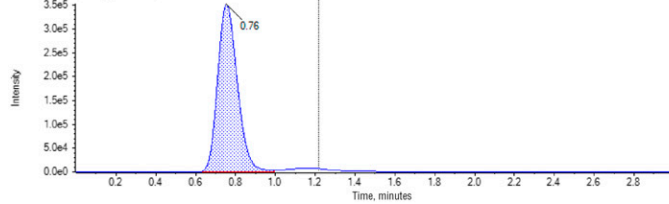

1000 - SIL-PPQ (standard) 541.0 / 294.0 - 20121003a VAP13\_14H.wiff (sample 34)  
Area: 22558, height: 3352, RT: 0.74 minutes

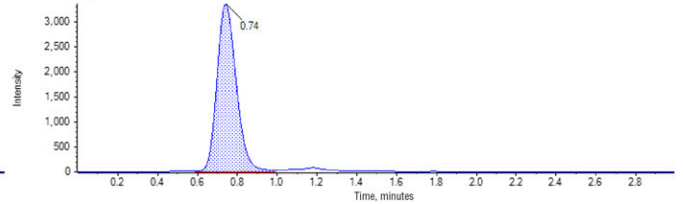

SUPPLEMENTAL FIGURE 22. High calibration standard (PPQ 1,000 ng/mL). PPQ = piperazine.

VAP02H-D0-0H - PPQ (Unknown) 535.0 / 288.0 - 20120801 VAP02H.wiff (sample 48)  
Area: N/A, height: N/A, RT: N/A minutes

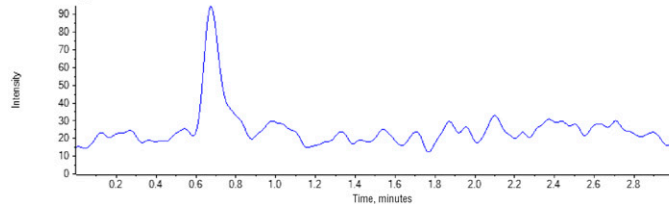

VAP02H-D0-0H - SIL-PPQ (unknown) 541.0 / 294.0 - 20120801 VAP02H.wiff (sample 48)  
Area: 30811, height: 4655, RT: 0.66 minutes

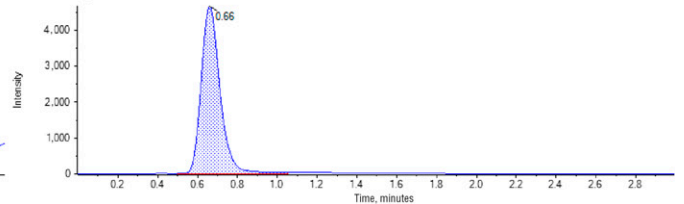

SUPPLEMENTAL FIGURE 23. VAP02 plasma sample pre-dose.

VAP02H-D0-3H - PPQ (Unknown) 535.0 / 288.0 - 20120801 VAP02H.wiff (sample 50)  
Area: 3089421, height: 45696, RT: 0.66 minutes

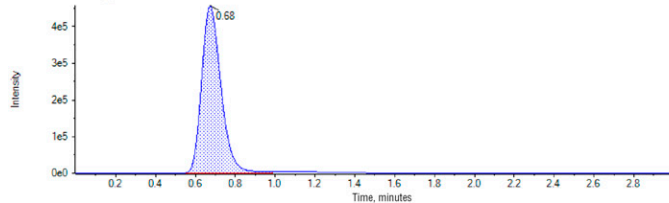

VAP02H-D0-3H - SIL-PPQ (unknown) 541.0 / 294.0 - 20120801 VAP02H.wiff (sample 50)  
Area: 35491, height: 5295, RT: 0.66 minutes

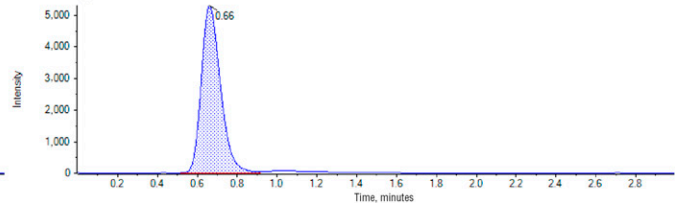

SUPPLEMENTAL FIGURE 24. VAP02 plasma sample 3 hours post-dose (PPQ 882.5 ng/mL). PPQ = piperazine.

VAP02H-D42 - PPQ (Unknown) 535.0 / 288.0 - 20120806 VAP03H.wiff (sample 54)  
Area: 17169, height: 2481, RT: 0.68 minutes

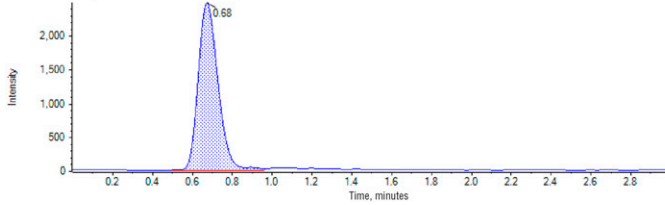

VAP02H-D42 - SIL-PPQ (unknown) 541.0 / 294.0 - 20120806 VAP03H.wiff (sample 54)  
Area: 8976, height: 1314, RT: 0.66 minutes

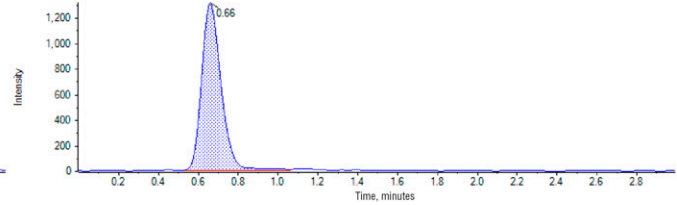

SUPPLEMENTAL FIGURE 25. VAP02 plasma sample 12 hours post-dose (PPQ 841.0 ng/mL). PPQ = piperaquine.

### Method validation.

- **Linearity and reproducibility**

Piperaquine inter-day precision of the assay calibration standards of plasma PPQ concentrations between 0.25 and 1,000 ng/mL were obtained over at least 13 occasions. Excellent linearity was obtained over this range, with good precision and accuracy (Supplemental Table 10).

SUPPLEMENTAL TABLE 10  
Inter-day accuracy and precision of piperaquine assay

| Nominal concentration (ng/mL) | Mean (ng/mL) | SD (ng/mL) | CV (%) | n  | Accuracy (%) |
|-------------------------------|--------------|------------|--------|----|--------------|
| 0.25                          | 0.247        | 0.03       | 11.9   | 28 | 98.5         |
| 0.5                           | 0.496        | 0.04       | 7.6    | 20 | 99.2         |
| 1.0                           | 1.06         | 0.07       | 6.6    | 23 | 106.0        |
| 5.0                           | 5.06         | 0.21       | 4.1    | 25 | 101.3        |
| 10                            | 10.2         | 0.43       | 4.3    | 25 | 101.7        |
| 50                            | 49.3         | 2.1        | 4.2    | 24 | 98.7         |
| 100                           | 99.2         | 3.0        | 3.0    | 23 | 99.2         |
| 250                           | 244.6        | 12.0       | 4.9    | 25 | 97.9         |
| 500                           | 496.1        | 18.8       | 3.8    | 25 | 99.2         |
| 1,000                         | 1,023.0      | 23.8       | 2.3    | 13 | 102.3        |

CV = coefficient of variation.

### Piperaquine intraday precision

Calibration standards of plasma PPQ concentrations from 0.25 to 500 ng/mL were analyzed on the same day (Supplemental Table 11). Excellent linearity was obtained over this range, with good precision and accuracy.

SUPPLEMENTAL TABLE 11  
Intraday accuracy and precision of piperaquine assay

| Nominal concentration (ng/mL) | Mean (ng/mL) | SD (ng/mL) | CV (%) | n | Accuracy (%) |
|-------------------------------|--------------|------------|--------|---|--------------|
| 0.25                          | 0.252        | 0.040      | 15.97  | 5 | 100.4        |
| 0.5                           | 0.530        | 0.034      | 6.40   | 5 | 106.0        |
| 1.0                           | 1.048        | 0.067      | 6.35   | 5 | 104.8        |
| 5.0                           | 5.116        | 0.170      | 3.32   | 5 | 102.3        |
| 10                            | 10.494       | 0.541      | 5.15   | 5 | 104.9        |
| 50                            | 49.216       | 1.365      | 2.77   | 5 | 98.4         |
| 100                           | 101.335      | 1.603      | 1.58   | 5 | 101.3        |
| 250                           | 252.820      | 8.658      | 3.42   | 5 | 101.1        |
| 500                           | 502.052      | 30.969     | 6.17   | 5 | 100.4        |

CV = coefficient of variation.

- The LLOQ using 50 µL of plasma was 0.25 ng/mL, with a CV of 11.9% and an accuracy of 98.5%.
- A quadratic regression equation  $y = ax^2 + bx + c$ , where  $x$  is the amount of drug and  $y$  is the peak area ratio, was used to determine the concentrations of unknowns and QC samples. A typical regression equation of a calibration curve was as follows:
- $a = 2.15618 \times 10^{-5}$ ,  $b = 0.12777$ ,  $c = 0.02025$ , with  $r = 0.99780$  and relative standard deviation (RSD) of 0.02716.

### Quality control plasma samples.

- Paired QC samples for low, mid-, and high concentrations were included with each analytical batch, and batches that had QC failures as per DE (Pharm) other SOP002—HPLC method validation and quality assurance were submitted for re-assay. Results of accuracy and precision of QC samples (low–mid–high concentrations) that fell within acceptance criteria are shown for PPQ in Supplemental Table 12.

SUPPLEMENTAL TABLE 12  
Accuracy and precision of piperazine of QC samples

|                               |       |       |       |
|-------------------------------|-------|-------|-------|
| Nominal concentration (ng/mL) | 1     | 100   | 400   |
| No. of observations           | 41    | 44    | 45    |
| Mean (ng/mL)                  | 0.973 | 97.3  | 389   |
| SD (ng/mL)                    | 0.08  | 4.24  | 23.9  |
| CV (%)                        | 8.0   | 4.4   | 6.2%  |
| Accuracy (%)                  | 97.3% | 97.3% | 97.2% |

CV = coefficient of variation; QC = quality control.

## SUPPLEMENTAL MATERIAL 6

SUPPLEMENTAL TABLE 13  
Plasma concentrations of PPQ and DAQ after 3-day regimens of Artequick and Coarsucam in healthy Vietnamese volunteers

| 3-day drug regimen | Drug | Dose | Time (hours) after dose | Concentration median (IQR) (ng/mL) |               |
|--------------------|------|------|-------------------------|------------------------------------|---------------|
| Artequick          | PPQ  | 1st  | 3                       | 655.8                              | 422.1–848.5   |
| Artequick          | PPQ  | 2nd  | 3                       | 879.7                              | 605.1–1,233.3 |
| Artequick          | PPQ  | 3rd  | 3                       | 975.7                              | 693.9–1,264.7 |
| Artequick          | PPQ  | 1st  | 24                      | 125.1                              | 101.9–149.5   |
| Artequick          | PPQ  | 2nd  | 24                      | 308.7                              | 198.8–390.6   |
| Artequick          | PPQ  | 3rd  | 24                      | 256.0                              | 234.4–338.8   |
| Coarsucam          | AQ   | 1st  | 3                       | 15.3                               | 11.6–21.3     |
| Coarsucam          | AQ   | 2nd  | 3                       | 20.2                               | 16.2–25.7     |
| Coarsucam          | AQ   | 3rd  | 3                       | 20.6                               | 17.5–25.0     |
| Coarsucam          | DAQ  | 1st  | 3                       | 216.4                              | 187.3–290.1   |
| Coarsucam          | DAQ  | 2nd  | 3                       | 366.4                              | 318.7–524.9   |
| Coarsucam          | DAQ  | 3rd  | 3                       | 555.9                              | 447.4–637.0   |
| Coarsucam          | DAQ  | 1st  | 24                      | 77.3                               | 65.4–94.4     |
| Coarsucam          | DAQ  | 2nd  | 24                      | 169.4                              | 148.6–198.2   |
| Coarsucam          | DAQ  | 3rd  | 24                      | 154.6                              | 143.2–185.9   |

AQ = amodiaquine; DAQ = desethylamodiaquine; IQR = interquartile range; PPQ = piperazine.
